# Supplementary material
Source: PubMed Central journal article supplement (PMC4767356)
Supplement: JCI80071.sd.pdf [file JCI80071.sd.pdf]

### **Supplemental Figure 1: Flow cytometry gating strategy for CCR/CXCR homing receptors**

First, we discriminated cells based on size scatter and, after exclusion of doublet cells and dead cells, as well as non T cells using the dump channel (staining for CD14, CD15, CD16 and CD19), we analyzed T cell markers. Hence, we gated on CD4<sup>+</sup> and CD8<sup>+</sup> T cells to analyze distinct subsets of naïve or effector/memory cells using CD45RA and CCR7 mAbs. In each subset, we evaluated the percentage of positive cells for each homing receptor. To evaluate these 9 receptors, we stained cells with one of three 3 different staining cocktails, the first one containing CRTH2, CCR6, CCR10, CXCR3 mAbs (9 colors), and the second and third, with CXCR5, CD103, CCR9 mAbs and CLA, CCR10, CXCR4 mAbs respectively (each 8 colors). An exemplification of the adopted appropriate gating strategy is depicted.

### **Supplemental Figure 2: Overall survival of 57 MMel studied for CCR and CXCR markers.**

Kaplan Meier curves of the three independent cohorts pooled together (patients characteristics and statistics for prognosis parameters presented in Suppl. Table 2) and analyzed for overall survival from diagnosis (A) or from blood sampling for CCR and CXCR studies (B).

### **Supplemental Figure 3: Correlations between TNs, TCMs, TEMs, TEMRAs CD4<sup>+</sup> and CD8<sup>+</sup> T cells.**

A. Distributions of correlation coefficients between the 4 subpopulations (TNs, TCMs, TEMs and TEMRAs) of the indicated flow cytometry parameters (indicated on y-axis). Dashed lines correspond to the 0.05, 0.01 and 0.001 *P*-significance levels. Correlation matrices from the 20 groups were found to differ from an identity matrix ( $P < 10^{-20}$ , Bartlett's test). B. Distributions of correlation coefficients between CD4<sup>+</sup> and corresponding CD8<sup>+</sup> T lymphocytes. Upper panel: 4 subpopulations (TNs, TEMRAs, TEMs, TCMs) for each family. Lower panel: double positive cells. Dashed lines correspond to the 0.05, 0.01 and 0.001 *P*-significance levels. The RV coefficient (given in parentheses) between the CD4<sup>+</sup> and CD8<sup>+</sup> sub-population matrices indicates a poor correlation index between CXCR4 and CD103 markers. Of note, each sample was split into two batches that were stained with the same CCR10 mAb but different additional markers and then subjected to flow cytometry. Therefore, CCR10 was measured twice and featured on the graphs as CCR10 and CCR10.2. Note that these two CCR10 measurements correlated among each other.

### **Supplemental Figure 4: Increase in circulating proportions of CD4<sup>+</sup>CD103<sup>+</sup> TNs associated with liver metastases.**

A. ROC curves depicting the predictive properties of CD103 on CD4<sup>+</sup>TNs determined in patients presenting liver metastases (N=19) in multimetastatic patients (N=36) and associated area under the curve (AUC). B. Distribution of the expression of CD103 on CD4<sup>+</sup> TNs in each subset of

patients, stratified according to the diagnosis of liver metastases. C-D. Distributions of CD103<sup>+</sup> CD4<sup>+</sup> T cells coexpressing CXCR5 (C) or CCR9 (D) receptors in MMel patients who were known for the ulceration status (N=18). Each point represents one patient specimen and the total number is indicated for all subpopulations studied. Statistical analyses were performed by logistic (A) and beta regression (B-D) modeling. *P* values are indicated.

**Supplemental Figure 5: CLA expression on T cells is weakly associated with disease dissemination.**

A-B. CLA expression on CD8<sup>+</sup> (A) and CD4<sup>+</sup> (B) TEMRAs (upper panels) and TCMs (lower panels) is depicted for HV, for patients presenting with only cutaneous/LN metastases (Cut+LN), with additional lung involvement (Lu), with disseminated diseases (Multi) and with distant metastases plus lung involvement (Multi+Lu) at the time of inclusion in one of the three protocols described in M&M. C-D. Match-paired comparison between CLA expressions (performed in flow cytometry on fresh tissues) in all CD8<sup>+</sup> (C) and CD4<sup>+</sup> (D) T cell subsets from blood (B) and tumors (T) at surgery in the prospective cohort of 20 patients with MMel. Each point represents one patient specimen and the total number is indicated for all subpopulations studied. Statistical analyses were performed by beta regression (A-B) and linear mixed effects (C-D) modeling. Raw *P* values are indicated.

**Supplemental Figure 6: CD4<sup>+</sup>CXCR4<sup>+</sup> TEMRAs accumulated in tumor LN.**

A-B. CXCR4 expression on CD4<sup>+</sup>TEMRAs (A) and TCMs (B) is depicted for HV, for patients presenting with only cutaneous/LN metastases (Cut+LN), with additional lung involvement (Lu), with disseminated diseases (Multi) and with distant metastases plus lung involvement (Multi+Lu) at the time of inclusion in one of the three protocols described in M&M C. Match-paired comparison between CXCR4 expressions (performed by flow cytometry on fresh tissues) in all CD4<sup>+</sup> T cell subsets from blood (B) and tumors (T) at surgery in the prospective cohort of 20 patients with MMel. Each point represents one patient specimen and the total number is indicated for all subpopulations studied. Statistical analyses were performed by beta regression (A-B) and linear mixed effects (C) modeling. Raw *P* values are indicated.

**Supplemental Figure 7: CXCR5 expression decreases during lung metastases.**

A-B. CXCR5 expression on CD4<sup>+</sup> TEMRAs (A) and CD4<sup>+</sup>CCR9<sup>+</sup> T cells (B) is depicted for HV, for patients presenting with only cutaneous/LN metastases (Cut+LN), with additional lung (Lu) involvement, with disseminated diseases (Multi) and with metastases in lung and other distant organs (Multi+Lu) at the time of inclusion in one of the three protocols described in M&M C. Match-paired comparison between CXCR5 expressions (performed in flow cytometry on fresh

tissues) in all CD4<sup>+</sup> T cell subsets from blood (B) and tumors (T) at surgery in the prospective cohort of 20 patients with MMel D. CD4<sup>+</sup>CXCR5<sup>+</sup> T cell cytokine profile. Flow cytometry-guided sorting based on CXCR5/CD103 expression in blood CD4<sup>+</sup> T cells in one representative patient (out of two yielding similar results, means from duplicate wells) to analyze cytokine release after a 40 hr CD3/CD28 beads-driven stimulation. Each point represents one patient specimen and the total number is indicated for all subpopulations studied. Statistical analyses were performed by beta regression (A-B) and linear mixed effects (C) modeling. Raw *P* values are indicated.

### **Supplemental Figure 8. CRTH2 expression and distant metastases.**

Flow cytometric analyses of double positive CRTH2<sup>+</sup>CCR10<sup>+</sup> (A), CCR10<sup>+</sup>CXCR3<sup>+</sup> (B) and CRTH2<sup>+</sup>CXCR3<sup>+</sup> (C) CD4<sup>+</sup> T cells in 57 MMel patients according to their metastatic pattern at sampling. Each point represents one patient specimen and the total number is indicated for all subpopulations studied. Statistical analyses were performed by beta regression modeling. Raw *P* values are indicated.

### **Supplemental Figure 9. CD103 expression by CD4<sup>+</sup> TCMs associated with distant metastases.**

A. CD103 expression on CD4<sup>+</sup> TCMs is depicted for healthy volunteers (HV), for patients presenting with only cutaneous/lymph node (Cut+LN) metastases, with additional lung (Lu) involvement, with disseminated diseases (Multi) and with distant metastases plus lung involvement (Multi+Lu) at the time of inclusion in one of the three protocols described in M&M. B. CD4<sup>+</sup>CD103<sup>+</sup> T cell cytokine profile. Flow cytometry-guided sorting based on the CXCR5/CD103 expression of blood CD4<sup>+</sup> T cells in one representative patient (out of two yielding similar results, means from duplicate wells) to analyze cytokine release after a 40 hr CD3/CD28 beads-driven stimulation.. C. Match-paired comparison between CD103 expression (performed by flow cytometry on fresh tissues) in all CD4<sup>+</sup> T cell subsets from blood (B) and tumors (T) of patients at surgery in the prospective cohort of 20 patients with MMel. D. Flow cytometry analysis of CD103 and Foxp3 expression gating on CD4<sup>+</sup> T cells in one representative example out of three. Each point represents one patient specimen and the total number is indicated for all subpopulations studied. Statistical analyses were performed by beta regression (A) and linear mixed effects (C) modeling. Raw *P* values are indicated.

Suppl. Figure 1

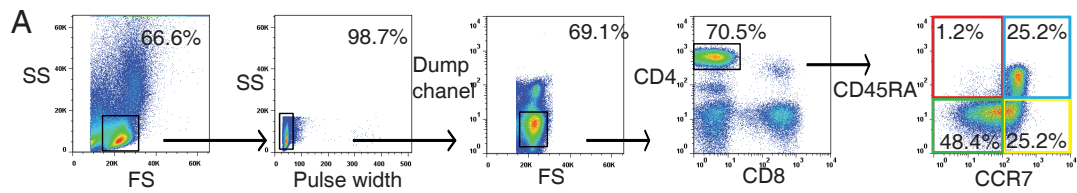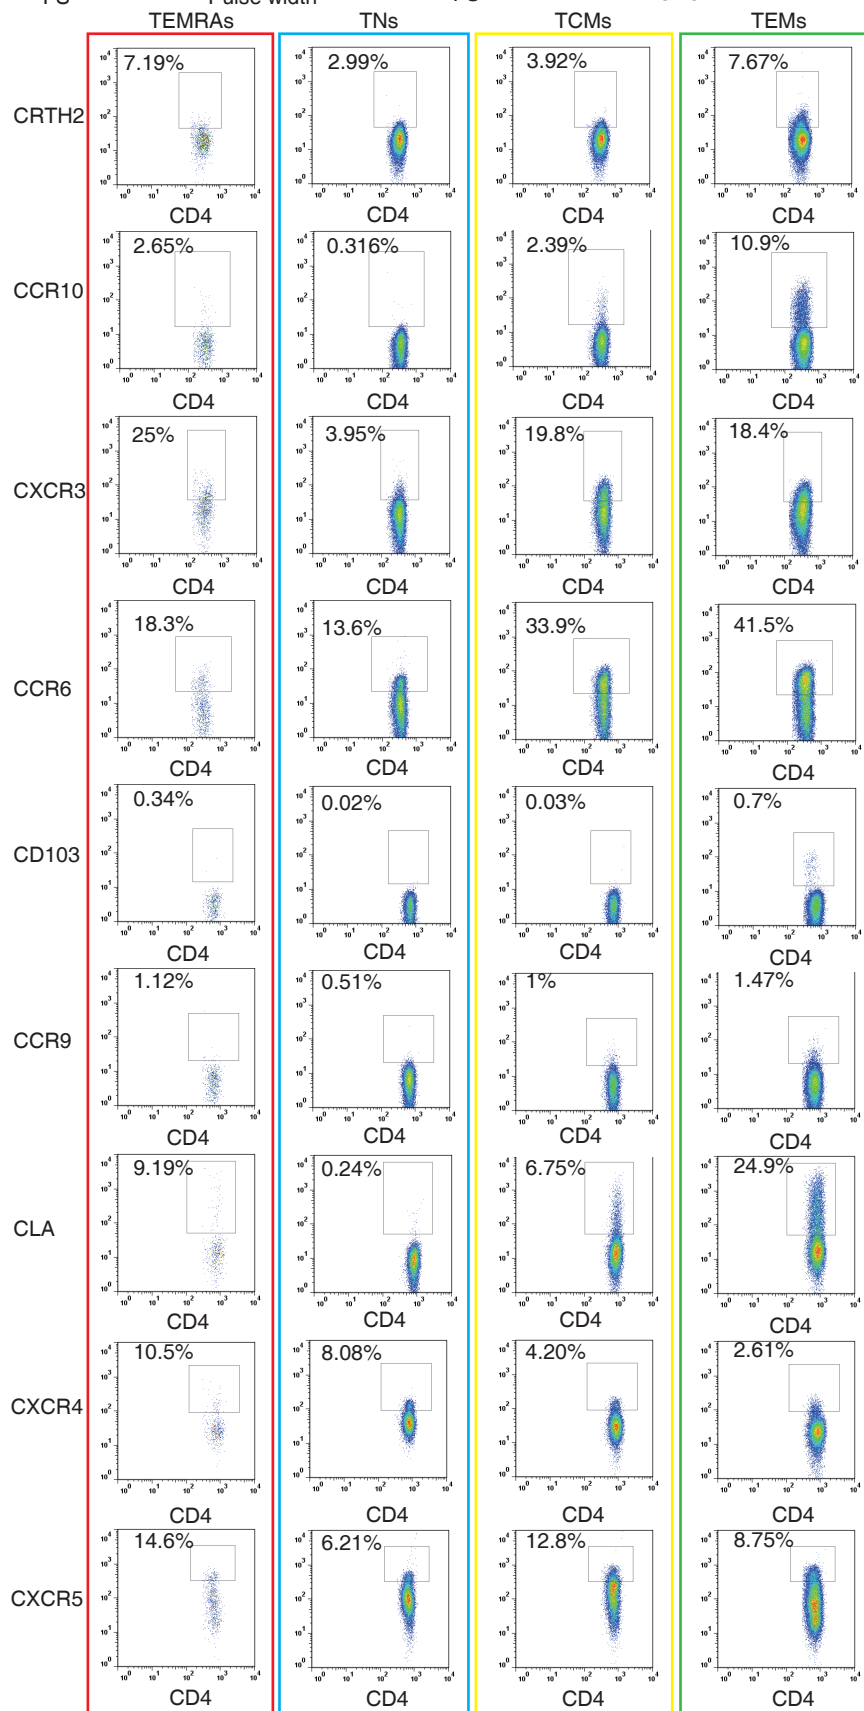

**B**

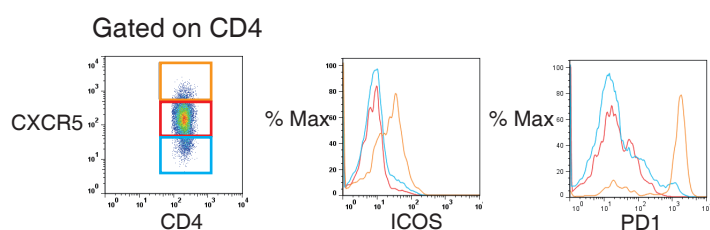

Suppl. Figure 2

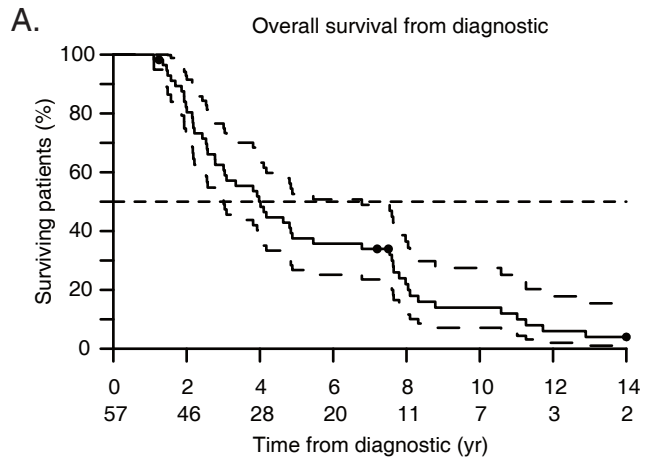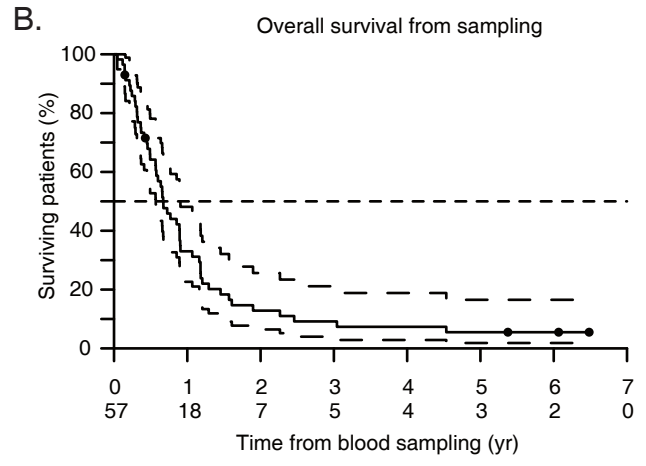

Suppl. Figure 3

A.

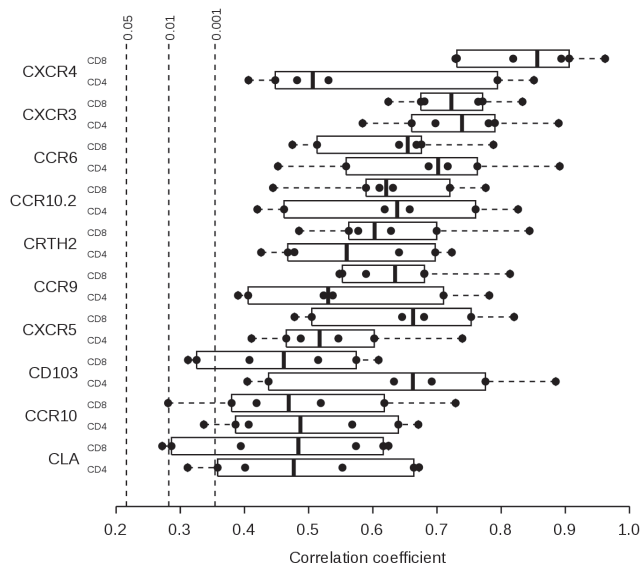

B.

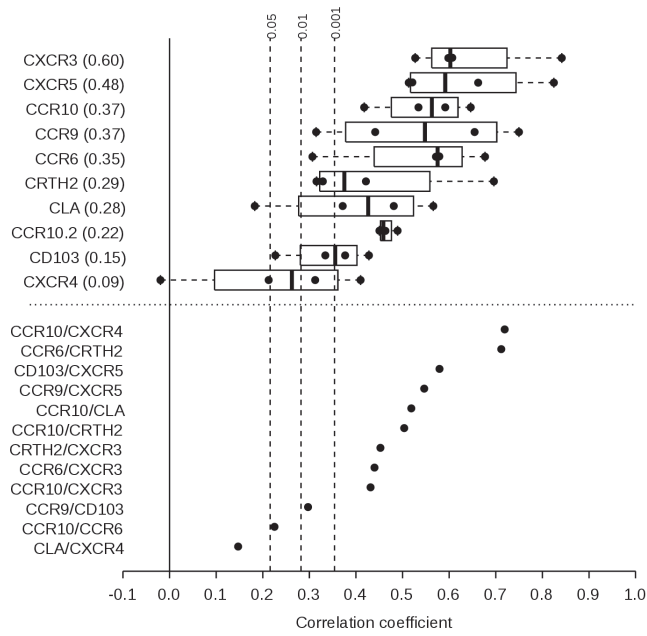

Suppl. Figure 4

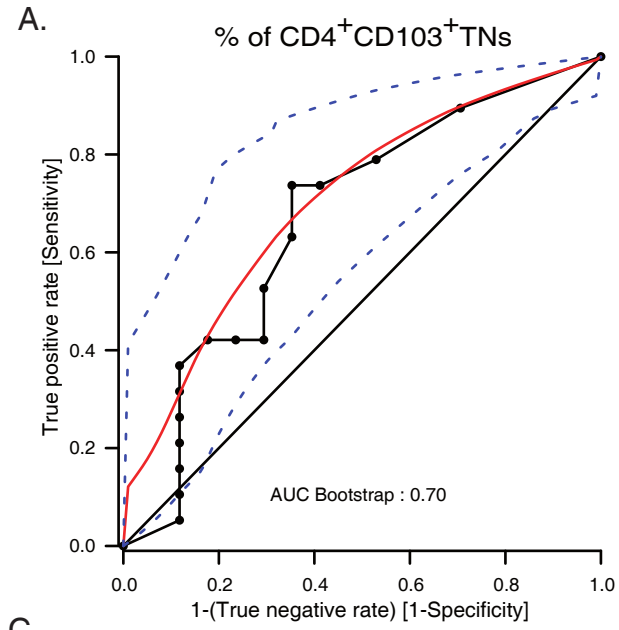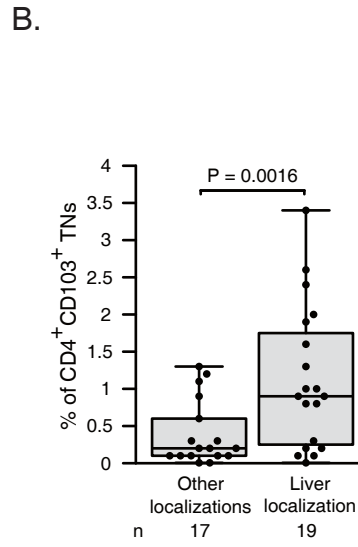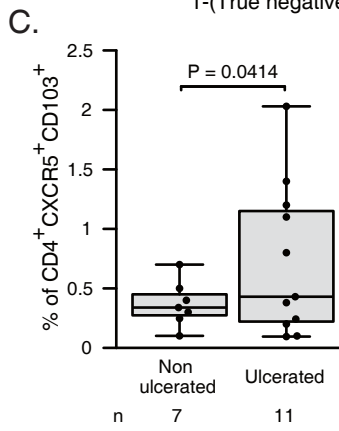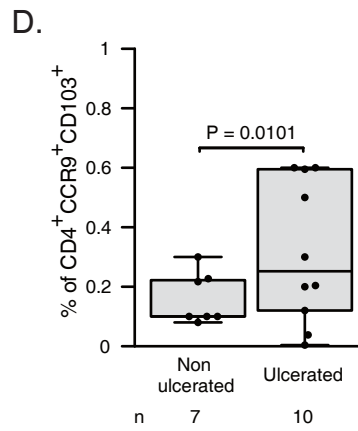

Suppl. Figure 5

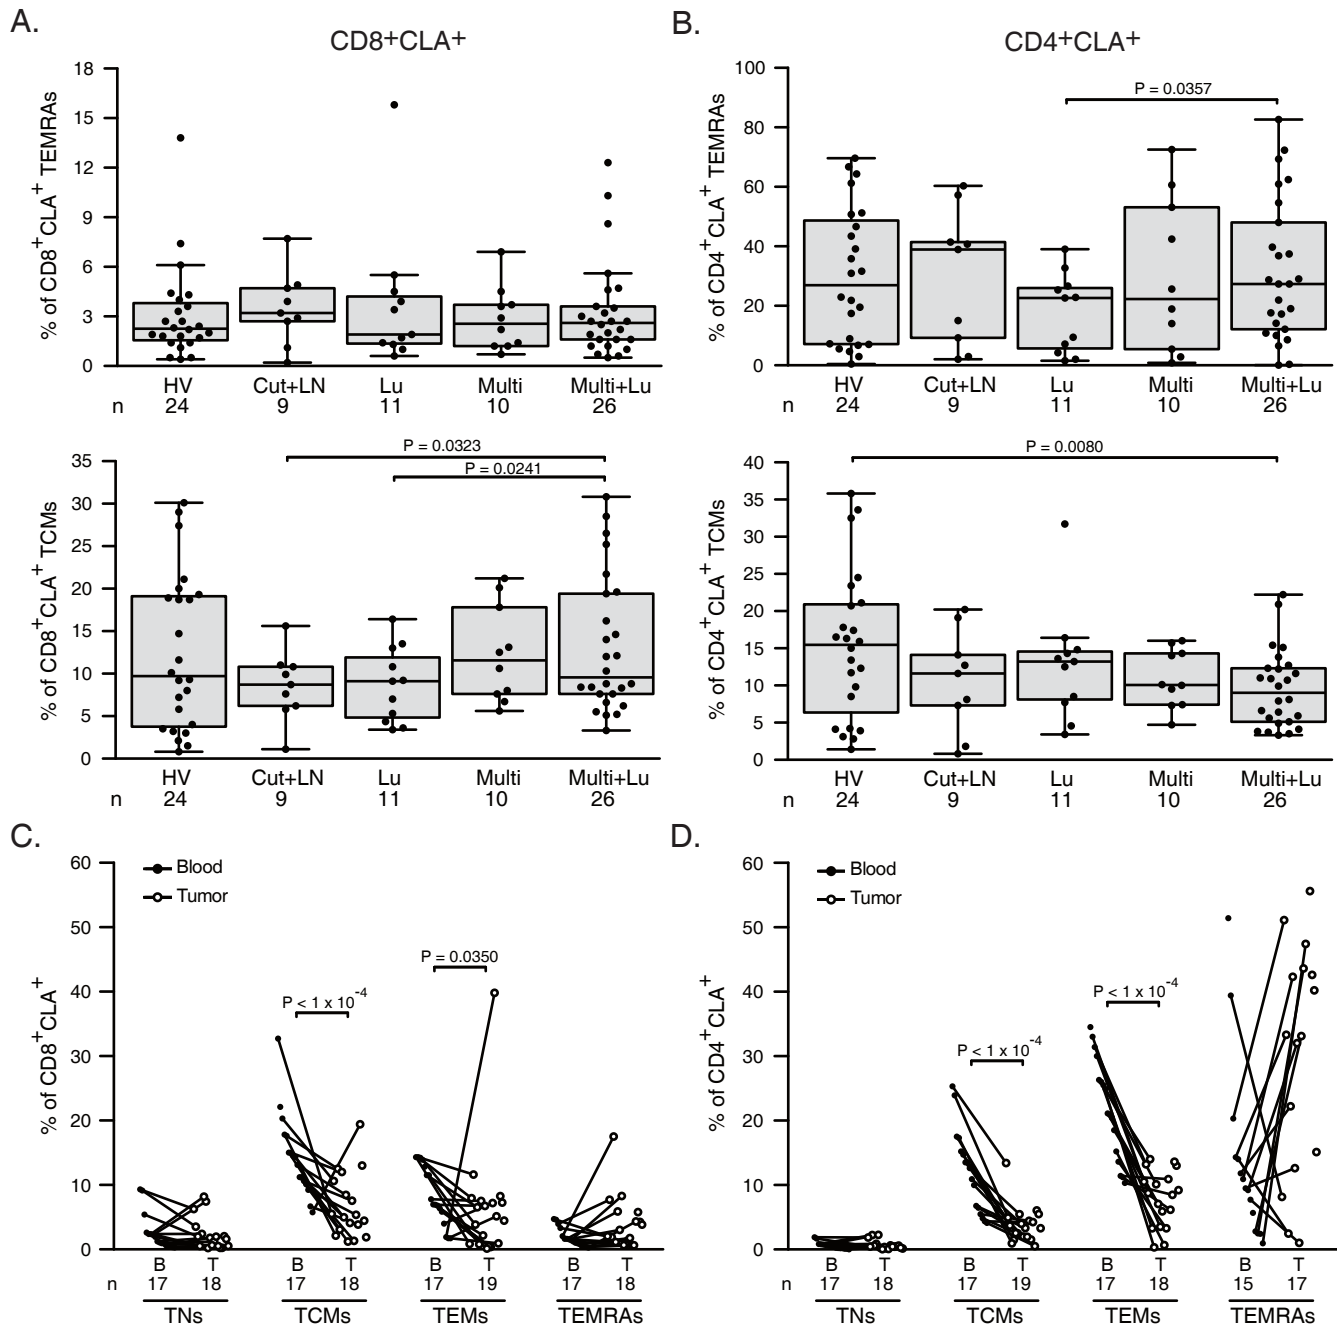



Suppl. Figure 6

A.

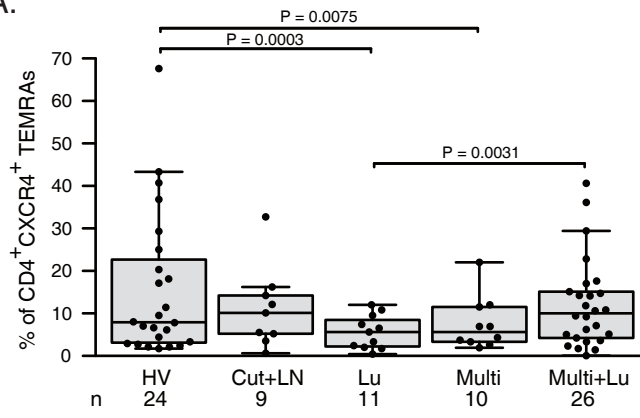

B.

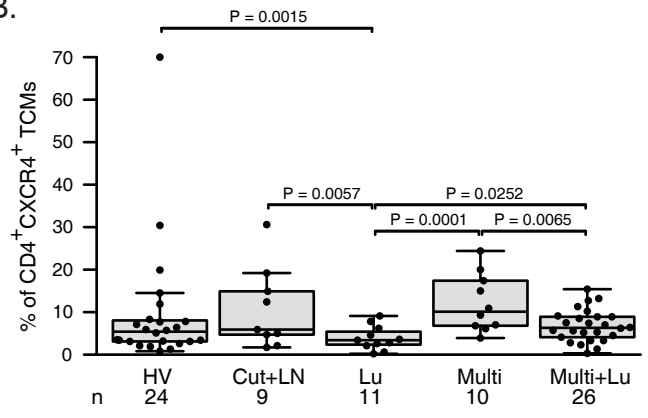

C.

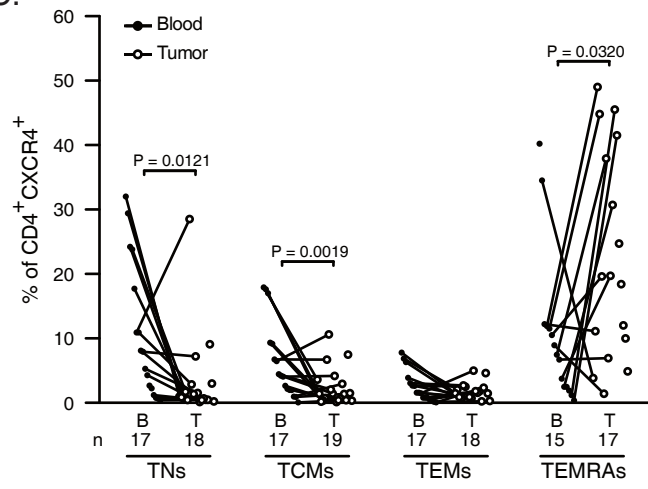

Suppl. Figure 7

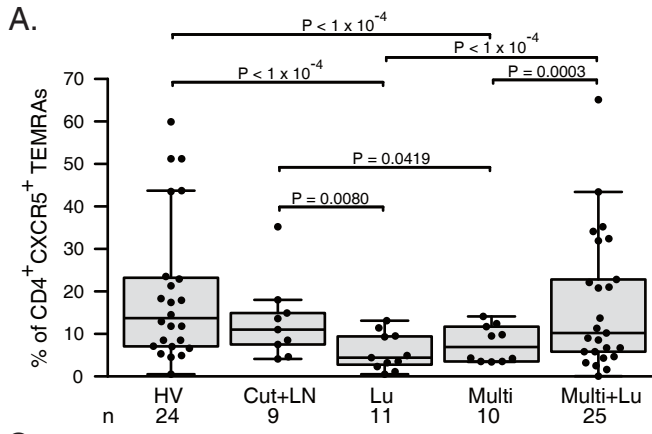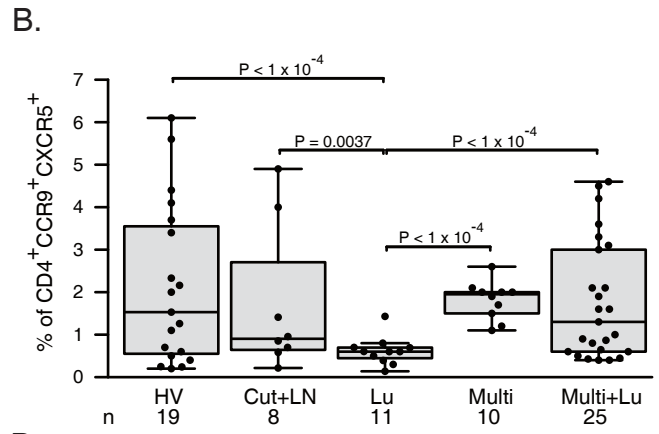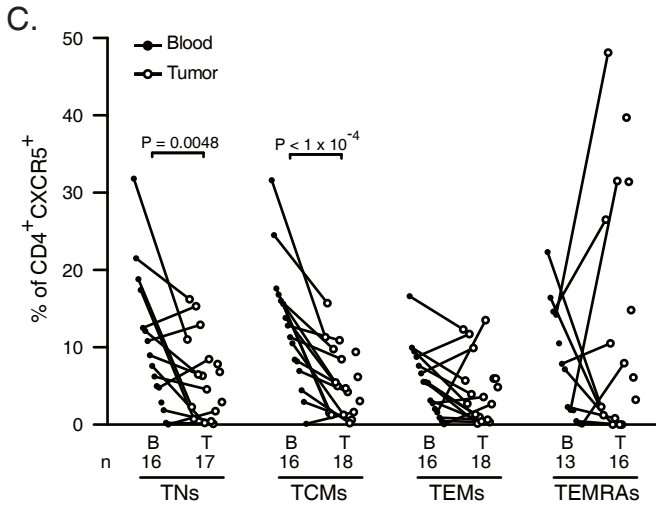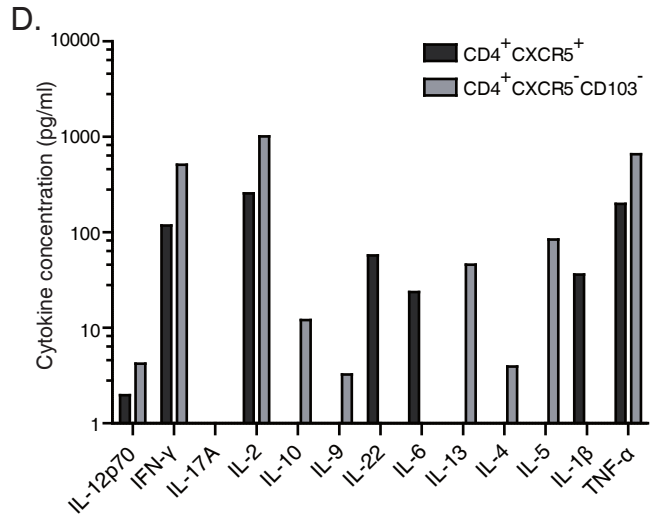

Suppl. Figure 8

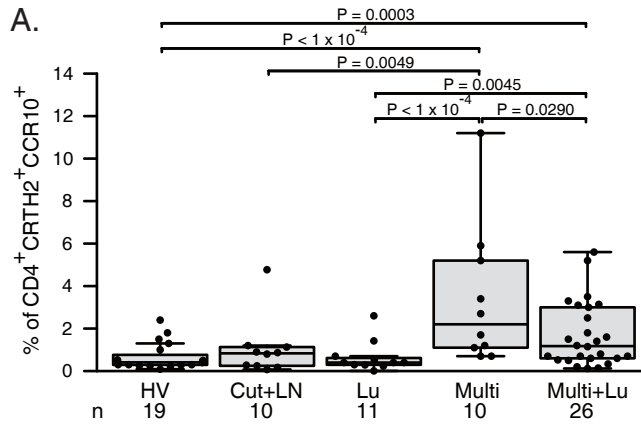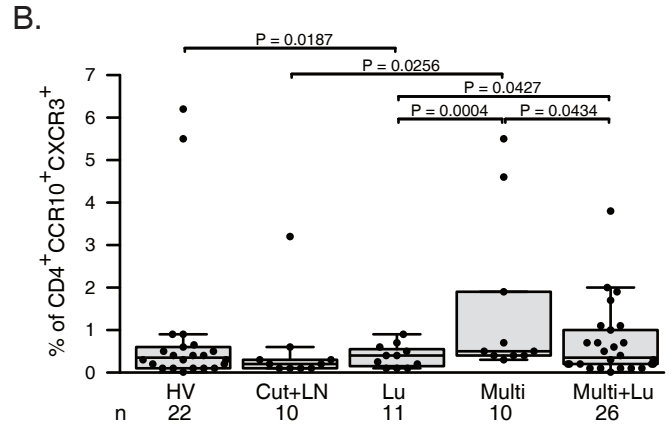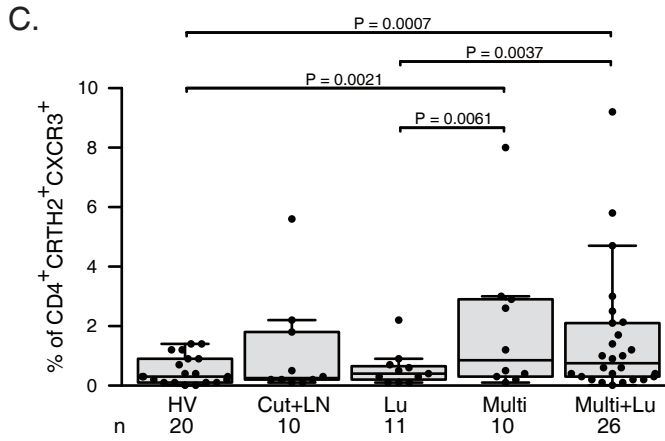

Suppl. Figure 9

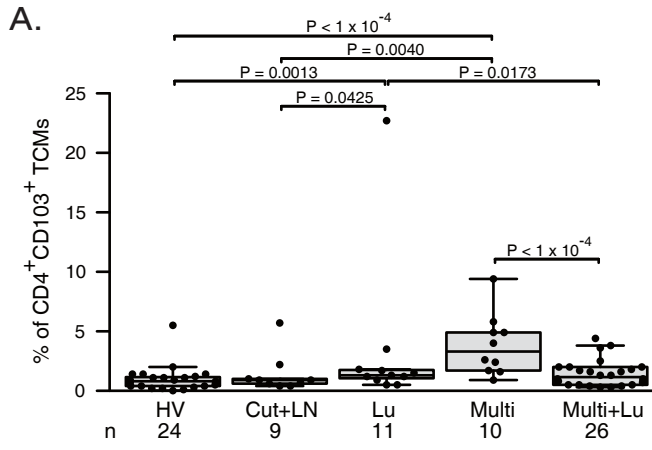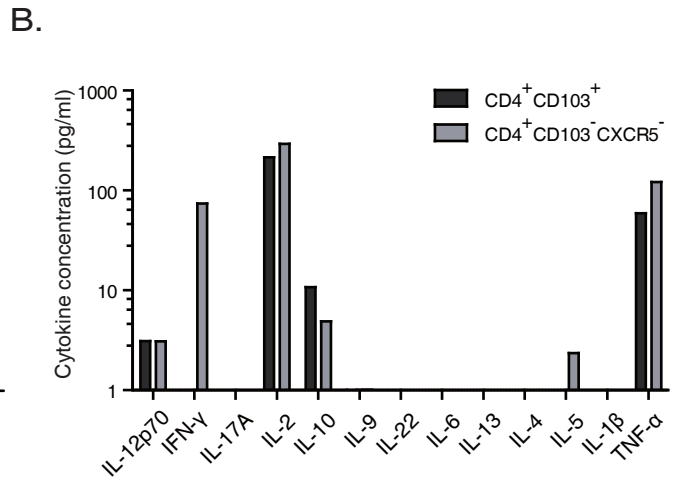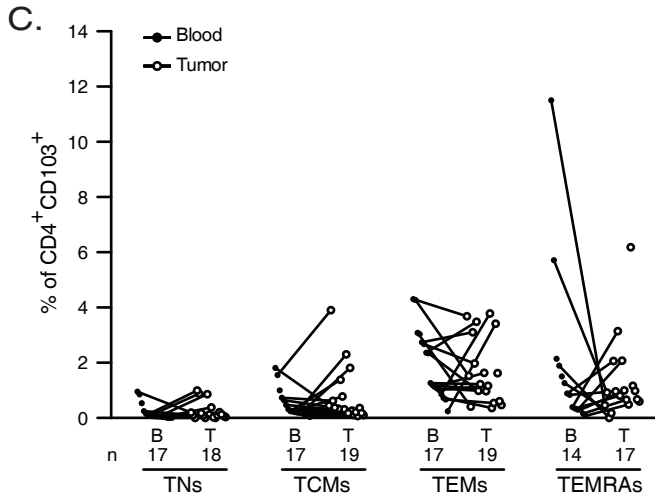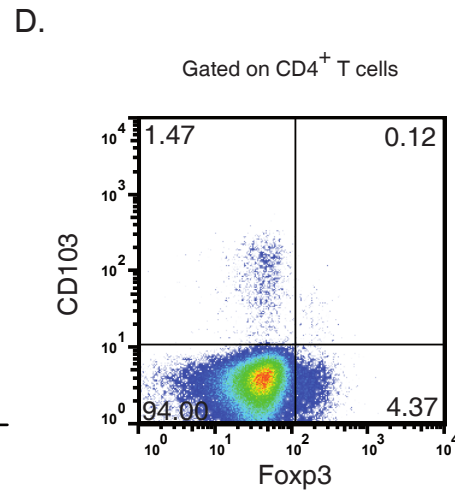

**Supplemental Table 1: Characteristics of mAbs used in this study**

| <i>Specificity</i> | <i>Fluorochrome</i> | <i>Ab clone</i> | <i>Company</i> | <i>Reference</i> |
|--------------------|---------------------|-----------------|----------------|------------------|
| <b>CXCR5</b>       | AF488               | RF8B2           | BD             | 558112           |
| <b>CLA</b>         | FITC                | HECA-452        | BD             | 561987           |
| <b>CRTH2</b>       | FITC                | BM16            | BD             | 561659           |
| <b>CD103</b>       | PE                  | Ber-ACT8        | BD             | 550260           |
| <b>CCR10</b>       | PE                  | 314305          | R&D            | FAB3478P         |
| <b>CD4</b>         | PE-CF594            | RPA-T4          | BD             | 562281           |
| <b>CD8</b>         | PerCP               | SK1             | BD             | 345774           |
| <b>CCR9</b>        | PerCP Cy5.5         | BL/CCR9         | Biologend      | 346303           |
| <b>CXCR4</b>       | PerCP Cy5.5         | 12G5            | Biologend      | 306516           |
| <b>CXCR3</b>       | PE Cy7              | 1C6/CXCR3       | BD             | 560831           |
| <b>CD4</b>         | PE Cy7              | SK3             | BD             | 557852           |
| <b>CCR7</b>        | BV421               | G043H7          | Biologend      | 353208           |
| <b>CD14</b>        | V500                | M5E2            | BD             | 561391           |
| <b>CD15</b>        | V500                | HI98            | BD             | 561585           |
| <b>CD16</b>        | V500                | 3G8             | BD             | 561394           |
| <b>CD19</b>        | V500                | HIB19           | BD             | 561121           |
| <b>CD8b</b>        | APC                 | 2ST8.5H7        | BD             | 641058           |
| <b>CCR6</b>        | AF647               | 11A9            | BD             | 560466           |
| <b>CD45RA</b>      | APC-H7              | HI100           | BD             | 560674           |
| <b>Dead Cells</b>  | Yellow              | --              | Invitrogen     | L34959           |

**Supplemental Table 2: Retrospective analysis performed on 3 cohorts gathering 57 MMel patients; impact of clinical parameters on the overall survival from blood sampling**

|                                            |                    | <i>N [%]</i>      | <i>HR [95 %CI]</i>                  | <i>LRT, P value</i>        |
|--------------------------------------------|--------------------|-------------------|-------------------------------------|----------------------------|
| Age (yrs) <sup>A</sup>                     |                    | 44 [13;72]        | 0.99 [0.97;1.01], <i>P</i> = 0.5368 | 0.38,<br><i>P</i> = 0.5368 |
| Gender                                     | M                  | 29 [50.9]         | 1                                   | 1.11,                      |
|                                            | F                  | 28 [49.1]         | 1.34 [0.77;2.32], <i>P</i> = 0.2924 | <i>P</i> = 0.2924          |
| Breslow (mm) on primary tumor <sup>A</sup> |                    | 2.2<br>[0.0;12.0] | 0.95 [0.84;1.09], <i>P</i> = 0.4568 | 0.55,<br><i>P</i> = 0.4568 |
| Stage                                      | III                | 10 [17.5]         | 1                                   | 6.69,                      |
|                                            | IV                 | 47 [82.5]         | 2.58 [1.16;5.76], <i>P</i> = 0.0097 | <i>P</i> = 0.0097          |
| Metastases                                 | Skin+LN            | 10 [17.5]         | 1                                   |                            |
|                                            | Lung               | 11 [19.3]         | 1.94 [0.75;5.04], <i>P</i> = 0.1589 | 12.49,                     |
|                                            | Miscellaneous      | 10 [17.5]         | 5.5 [2;15.11], <i>P</i> = 0.0007    | <i>P</i> = 0.0059          |
|                                            | Miscellaneous+Lung | 26 [45.6]         | 2.65 [1.13;6.24], <i>P</i> = 0.0148 |                            |
| Cohort                                     | IMAIL-2            | 5 [8.8]           | 1                                   |                            |
|                                            | Ludwig             | 13 [22.8]         | 0.64 [0.23;1.79], <i>P</i> = 0.3989 | 0.87,                      |
|                                            | SORAFTEM           | 39 [68.4]         | 0.8 [0.32;2.02], <i>P</i> = 0.6466  | <i>P</i> = 0.6485          |
| LDH (UI/L) <sup>A</sup>                    |                    | 230<br>[98;1027]  | 1 [1;1], <i>P</i> = 0.7187          | 0.13,<br><i>P</i> = 0.7187 |

<sup>A</sup>Mean[Min;Max]

**Supplemental Table 3: Chemokine receptor analysis performed on 4 different cohorts of 47 MMel patients treated with ipilimumab; description of main clinical parameters**

|                                              |                                                                                                          | <i>All patients -<br/>N [%]</i> | <i>French Cohort<br/>- N [%]</i> | <i>Italian<br/>Cohort - N<br/>[%]</i> | <i>American<br/>Cohort - N<br/>[%]</i> | <i>German<br/>Cohort - N<br/>[%]</i> |
|----------------------------------------------|----------------------------------------------------------------------------------------------------------|---------------------------------|----------------------------------|---------------------------------------|----------------------------------------|--------------------------------------|
| <b>Gender</b>                                | M                                                                                                        | 28 [59.6]                       | 12 [54.5]                        | 6 [60.0]                              | 7 [63.6]                               | 3 [75.0]                             |
|                                              | F                                                                                                        | 19 [40.4]                       | 10 [45.5]                        | 4 [40.0]                              | 4 [36.4]                               | 1 [25.0]                             |
| <b>Age (yrs)<sup>A</sup></b>                 |                                                                                                          | 61 [24;91]                      | 60 [82;37]                       | 55.6 [81;24]                          | 65 [91;41]                             | 66.8 [75;53]                         |
| <b>Stage</b>                                 | III                                                                                                      | 5 [10.6]                        | 4 [18.2]                         | 1 [10.0]                              | 0 [0.0]                                | 0 [0.0]                              |
|                                              | IV                                                                                                       | 42 [89.4]                       | 18 [81.8]                        | 9 [90.0]                              | 11 [100.0]                             | 4 [100.0]                            |
| <b>LDH (UI/L)<sup>A</sup></b>                |                                                                                                          | 356<br>[2510;128]               | 434<br>[2510;135]                | 347<br>[540;144]                      | 238<br>[477;135]                       | 279<br>[558;128]                     |
| <b>Dose of<br/>Ipilimumab<br/>(mg/kg)</b>    | 3                                                                                                        | 41 [87.2]                       | 16 [72.7]                        | 10 [100.0]                            | 11 [100.0]                             | 4 [100.0]                            |
|                                              | 10                                                                                                       | 6 [12.8]                        | 6 [27.2]                         | 0 [0.0]                               | 0 [0.0]                                | 0 [0.0]                              |
| <b>Concomitant<br/>therapy</b>               | No                                                                                                       | 34 [72.3]                       | 13 [59.1]                        | 10 [100.0]                            | 11 [100.0]                             | 0 [0.0]                              |
|                                              | Yes                                                                                                      | 13 [27.7]                       | 9 [40.9] <sup>B</sup>            | 0 [0.0]                               | 0 [0.0]                                | 4 [100.0] <sup>C</sup>               |
| <b>Prior therapy</b>                         | No                                                                                                       | 10 [21.3]                       | 9 [40.9]                         | 1 [10.0]                              | 0 [0.0]                                | 0 [0.0]                              |
|                                              | Yes<br>Radiotherapy/Chemotherapy<br>Tyrosine kinase inhibitor <sup>D</sup><br>Immunotherapy <sup>E</sup> | 37 [78.7]                       | 13 [59.1]                        | 9 [90.0]                              | 11 [100.0]                             | 4 [100.0]                            |
|                                              |                                                                                                          | 29 [61.7]                       | 7 [31.8]                         | 8 [80.0]                              | 11 [100.0]                             | 3 [75.0]                             |
|                                              |                                                                                                          | 10 [21.3]                       | 5 [22.7]                         | 3 [30.0]                              | 2 [18.2]                               | 1 [25.0]                             |
|                                              | 12 [25.5]                                                                                                | 6 [27.2]                        | 3 [30.0]                         | 2 [18.2]                              | 2 [50.0]                               |                                      |
| <b>Clinical<br/>response at 3<br/>months</b> | NR                                                                                                       | 29 [61.7]                       | 12 [54.5]                        | 6 [60.0]                              | 7 [63.6]                               | 4 [100.0]                            |
|                                              | R<br>Complete Response<br>Partial Response<br>Stable Disease                                             | 18 [38.3]                       | 10 [45.5]                        | 4 [40.0]                              | 4 [36.4]                               | 0 [0.0]                              |
|                                              |                                                                                                          | 1 [2.1]                         | 1 [4.6]                          | 0 [0.0]                               | 0 [0.0]                                | 0 [0.0]                              |
|                                              |                                                                                                          | 7 [14.9]                        | 7 [31.8]                         | 0 [0.0]                               | 0 [0.0]                                | 0 [0.0]                              |
|                                              |                                                                                                          | 10 [21.3]                       | 2 [9.1]                          | 4 [40.0]                              | 4 [36.4]                               | 0 [0.0]                              |

<sup>A</sup>Mean[Min;Max]

<sup>B</sup>Patients were treated with local radiotherapy.

<sup>C</sup>Patients received between 7 and 8 intratumoral injection of IL-2 (9MUI/injection).

<sup>D</sup>Vemurafenib, Dabrafenib, Pazopanib, Lenvatinib.

<sup>E</sup>IL-2, Interferon, anti-PD1, anti-CTLA-4

**Supplemental Table 4: Summary of the principal findings of this paper**

| <b>Surface marker</b> | <b>Subset of T cells</b>                                  | <b>Correlation with metastatic dissemination patterns</b>                                       | <b>Prognostic impact</b>                | <b>Predictive impact</b>              |
|-----------------------|-----------------------------------------------------------|-------------------------------------------------------------------------------------------------|-----------------------------------------|---------------------------------------|
| <b>CCR6</b>           | CD4 TEMs, TCMs, TEMRAs<br>CD8 TNs, TEMs, TCMs             | Reduction correlates with cutaneous and lymph node metastases                                   | Poor prognosis if expressed by CD8 TEMs |                                       |
| <b>CXCR3</b>          | CD4, CD8, TNs<br>CD4, CD8, TEMs<br>CD4 TCMs<br>CD4 TEMRAs | Reduction correlates with cutaneous and lymph node metastases                                   | Good prognosis if expressed by CD4 TEMs |                                       |
| <b>CXCR4</b>          | CD4 TEMs, TCMs<br>CD8 TNs, TEMs, TCMs, TEMRAs             | Reduction correlates with lung metastases                                                       |                                         |                                       |
| <b>CXCR5</b>          | CD4 TNs, TCMs, TEMRAs<br>CD8 TNs, TCMs                    | Reduction correlates with lung metastases                                                       |                                         |                                       |
| <b>CCR9</b>           |                                                           | Reduction correlates with lung metastases                                                       | Good prognosis if expressed by CD8 TNs  |                                       |
| <b>CD103</b>          | CD4 TNs<br><br>CD4 TEMs, TEMRAs, TCMs, TNs                | Increase correlates with hepatic metastasis<br><br>Increase correlates with visceral metastasis |                                         |                                       |
| <b>CCR9/CD103</b>     | CD4                                                       | Increase in ulcerated melanoma                                                                  |                                         |                                       |
| <b>CRTH2</b>          | CD4 TEMs<br>CD8 TCMs, TEMs                                | Increase correlates with visceral metastases                                                    |                                         |                                       |
| <b>CCR10</b>          | CD4 TEMs<br><br>CD4 and CD8 TNs, TCMs                     | Increase<br><br>Increase correlates with visceral metastases                                    | Poor prognosis                          |                                       |
| <b>CLA</b>            | CD8 TEMs                                                  | Increase after one injection of ipilimumab                                                      |                                         | Increase predicts ipilimumab response |
| <b>CCR10/CLA</b>      | CD4 TEMs                                                  |                                                                                                 | Poor prognosis                          |                                       |
